# Supplementary material
Source: MDPI journal article supplement (https://www.mdpi.com/2072-4292/12/11/1748)
Supplement: s1 [file s1]

## Supplemental Information

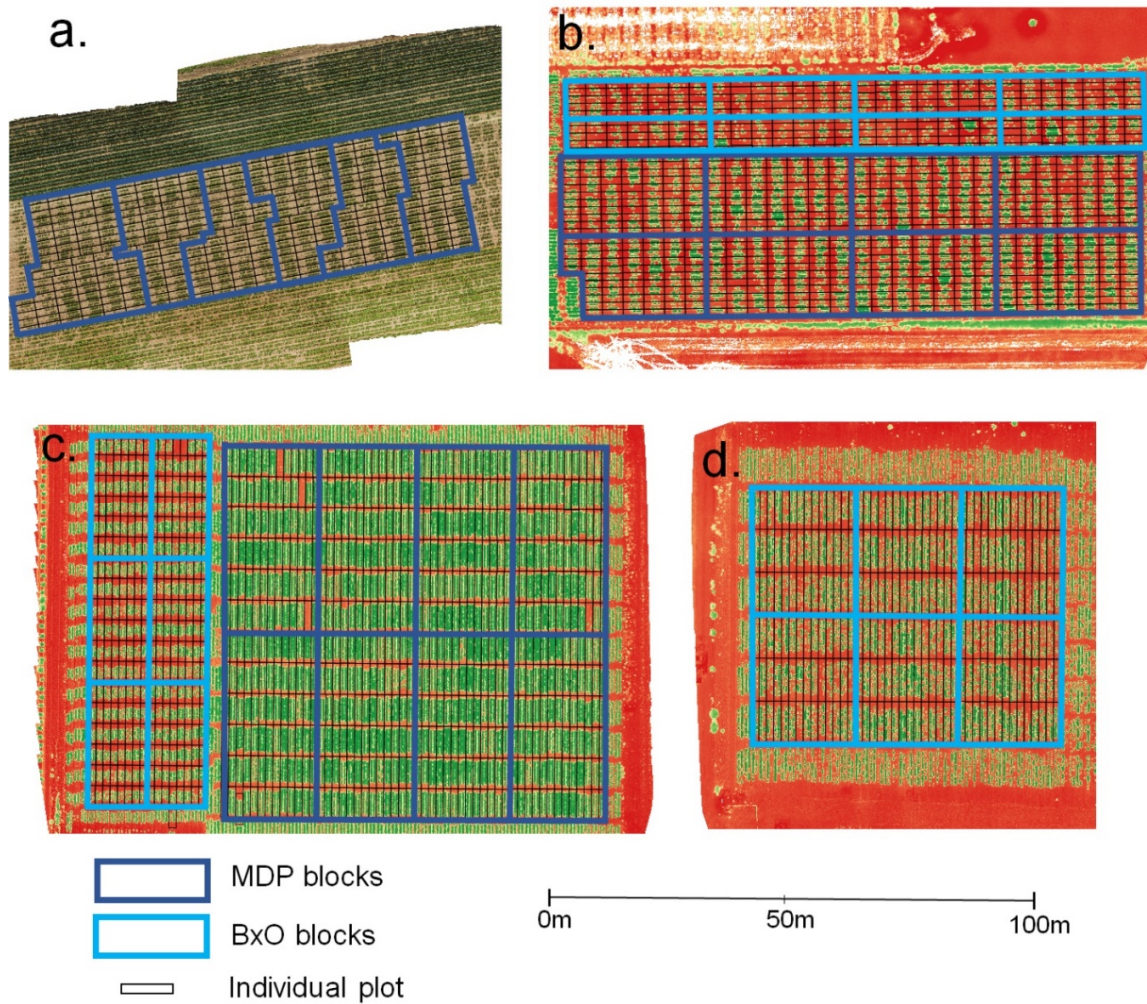

**Figure S1.** Layouts of evaluated fields in (a) 2016, (b) 2017, (c) 2018, and (d) 2019. The Middle American Diversity Panel (MDP) was grown 2016–2018, while the Black Nightfall x Orca (BxO) recombinant inbred population was grown 2017–2019. In each year, the field was separated into blocks with replicated controls in each block to account for spatial effects (augmented design, Federer and Raghavarao 1975). MDP blocks are indicated by dark blue boxes, BxO blocks are in light blue. Thin black lines represent plot shapefile boundaries for data extraction. All fields are represented to scale with one another.

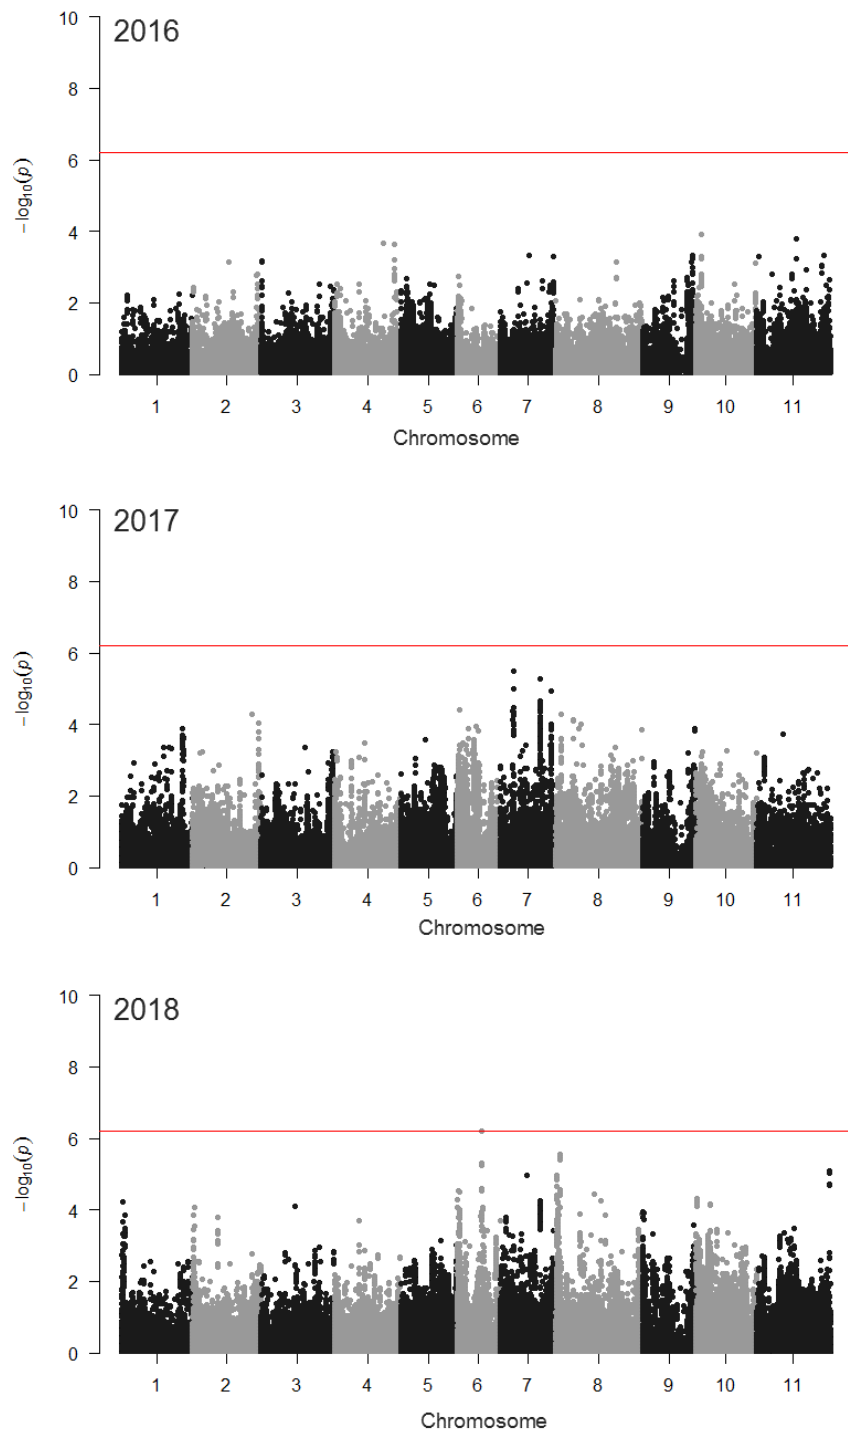

**Figure S2.** GWAS of seedling emergence rate in the Middle American Diversity panel. A SNP on Pv06 (LOD = 6.19) approached significance based on a conservative Bonferroni threshold (LOD = 6.21) of 2018 data. GWAS conducted in TASSEL based on a general linear model through the SNIPlay interface.

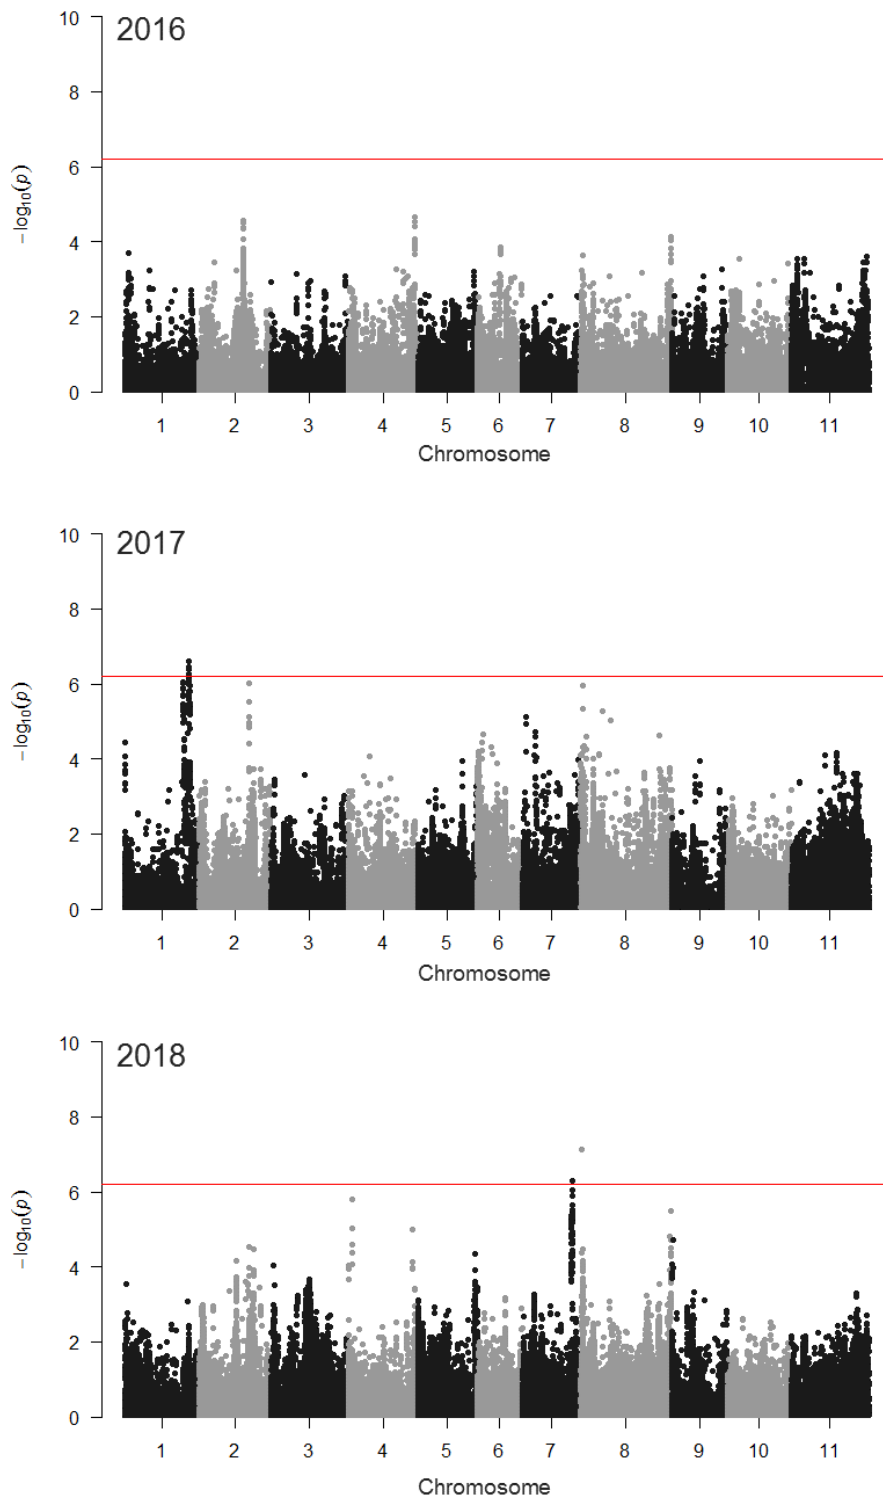

**Figure S3.** Hand-measured canopy height GWAS in the MDP. In 2017, a significant QTL was identified near PvTFL1y on chromosome Pv01. In 2018, the Pv07 locus associated with growth rate was also associated with hand-measured canopy height. GWAS conducted in TASSEL based on a general linear model through the SNIPlay interface. See Table S3 for more information on significant SNPs.

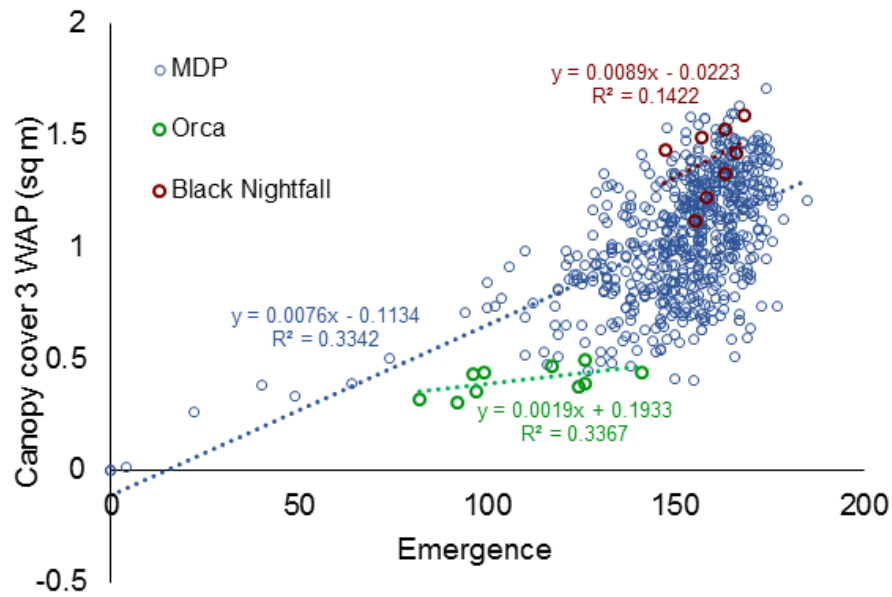

**Figure S4.** 2018 emergence and growth rate in the Middle American diversity panel, including Black Nightfall and Orca plots as controls. The x axis represents the number of seeds germinated out of 180 seeds planted. Black Nightfall has stronger seedling emergence, and above-average growth rates, even after emergence correction. Orca has lower emergence, and below-average growth rates relative to types with similar emergence rates.

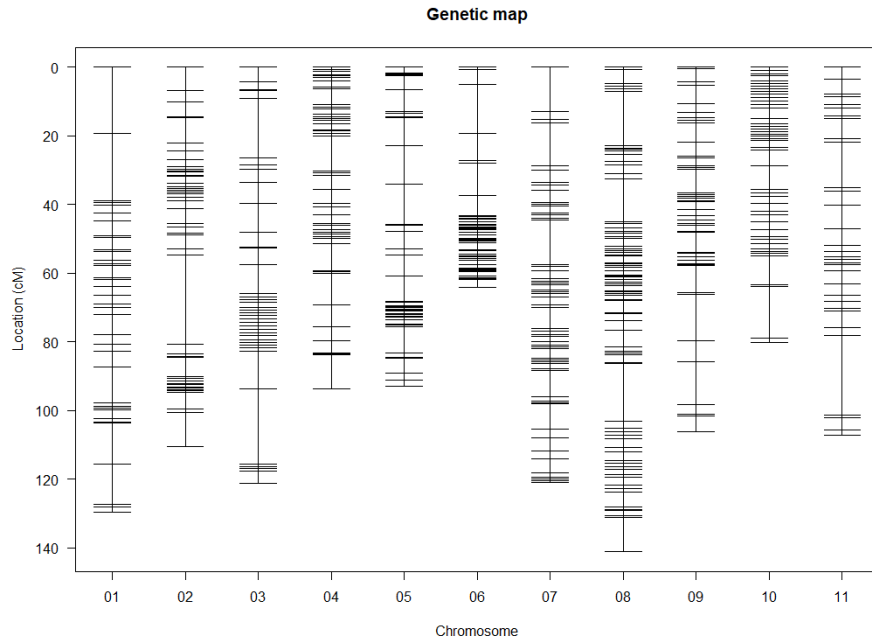

**Figure S5.** Black Nightfall  $\times$  Orca (B $\times$ O) population linkage map: Linkage groups (vertical lines) were ordered and oriented to correspond with the 11 chromosomes of the common bean reference genome[46,47]. A total of 730 markers (horizontal bars) were distributed across 1138cM of recombination space.

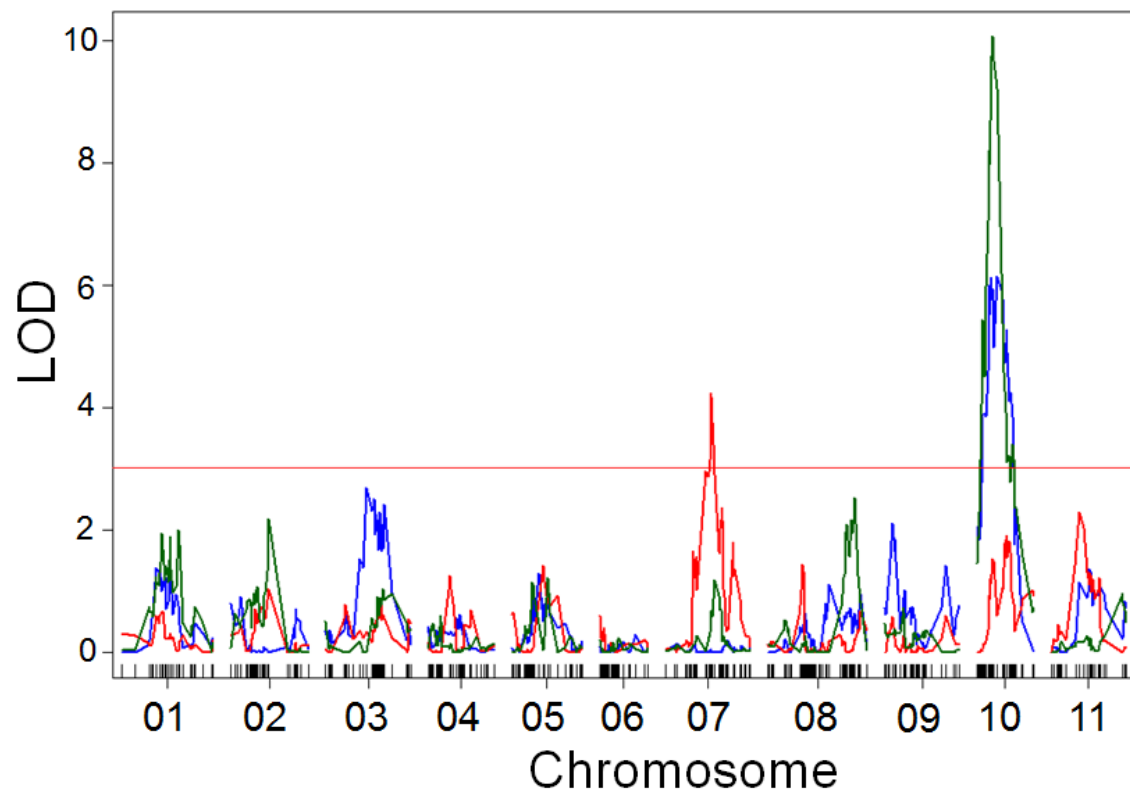

**Figure S6.** QTLs related to emergence rate. Robustness of germination and emergence has a profound effect on canopy growth. Emergence was low in 2017 (32%, blue) and 2019 (61%, green), but relatively high in 2018 (85%, red), and different QTLs controlled the trait between these years. The 95th percentile of LOD scores from 1000 randomized permutations of the data (LOD = 3.03) was used as a significance threshold.

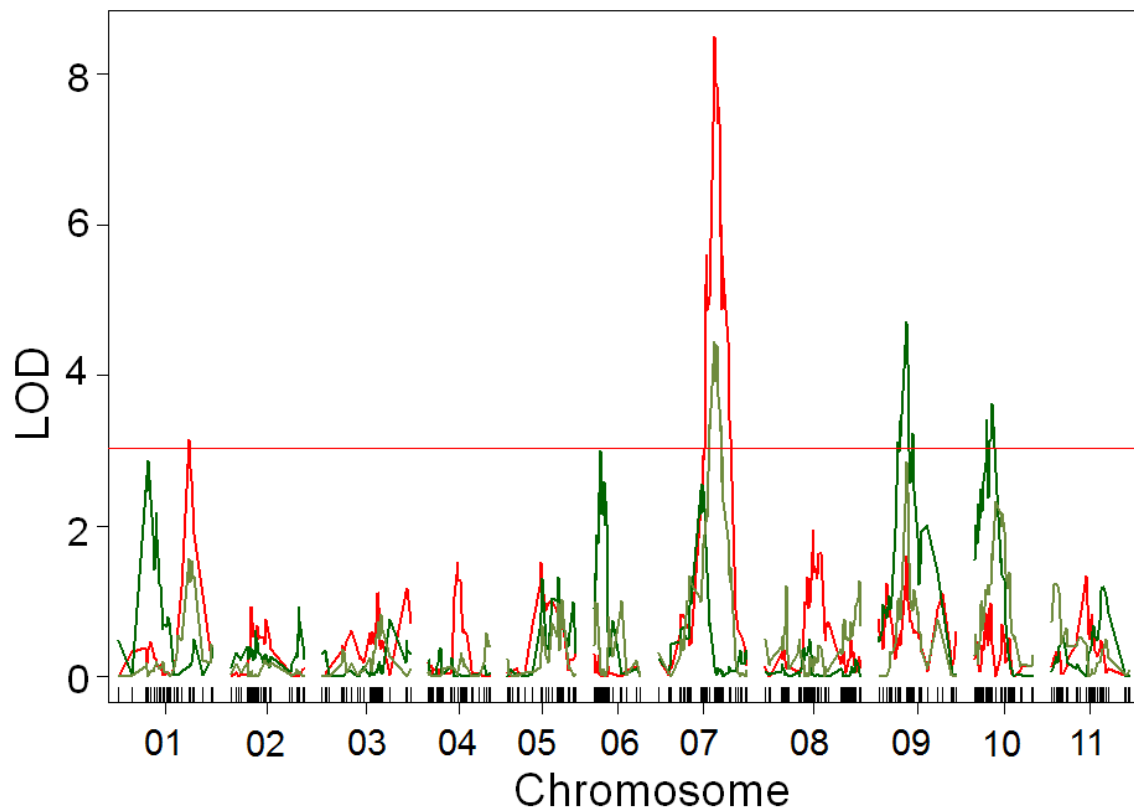

**Figure S7.** QTL mapping of hand-measured heights in the BxO population. At 42 DAP in 2018 (red), a major peak on Pv07 was evident. At 42 DAP in 2019 (dark green), several smaller QTLs were related to the trait, but by 63 DAP (light green), the Pv07 QTL had become significant as plants began to lodge. Results were based on data without correction for augmented design. The 95<sup>th</sup> percentile of LOD scores from 1000 randomized permutations of the data (LOD = 3.03) was used as a significance threshold.

**Table S1.** Positions of SNPs significantly associated with traits through GWAS.

| <b>Trait</b>                                                     | <b>Year</b> | <b>Most Significant SNP</b> | <b>Chromosome</b> | <b>Position</b> | <b>LOD, most significant SNP</b> |
|------------------------------------------------------------------|-------------|-----------------------------|-------------------|-----------------|----------------------------------|
| Canopy height, hand-measured 42 DAP                              | 2017        | S01_447278                  | Pv01              | 44777278        | 7.03                             |
| Canopy height, hand-measured 42 DAP                              | 2018        | S07_34462447                | Pv07              | 34462447        | 6.29                             |
| Canopy height, hand-measured 42 DAP                              | 2018        | S08_1316948                 | Pv08              | 1316948         | 7.14                             |
| Canopy height, drone-measured 42 DAP                             | 2017        | S03_13349070                | Pv03              | 13349070        | 6.62                             |
| Canopy height, drone-measured 42 DAP                             | 2017        | S05_30689797                | Pv05              | 30689797        | 6.99                             |
| Canopy height, drone-measured 42 DAP                             | 2018        | S04_55103                   | Pv04              | 55103           | 6.39                             |
| Canopy height, drone-measured 42 DAP                             | 2018        | S08_1316948                 | Pv08              | 1316948         | 6.42                             |
| Canopy cover growth rate, emergence corrected by LOESS residuals | 2016        | S01_1177020                 | Pv01              | 1177020         | 7.01                             |
| Canopy cover growth rate, emergence corrected by LOESS residuals | 2018        | S07_34512442                | Pv07              | 34512442        | 9.08                             |

**Table S2.** A comparison of early-season growth between Black Nightfall (BN) and Orca.

| Trait                                                                                 | Year | Mean (BN) | Mean (Orca) | SD (BN) | SD (Orca) | p-Value (two-Tailed t-Test) | Significance |
|---------------------------------------------------------------------------------------|------|-----------|-------------|---------|-----------|-----------------------------|--------------|
| Emergence                                                                             | 2016 | 44.83     | 41.33       | 12.90   | 11.59     | 0.66                        | ns           |
| Emergence                                                                             | 2017 | 26.38     | 12.75       | 6.39    | 7.07      | 0                           | **           |
| Emergence                                                                             | 2018 | 159.63    | 109.88      | 6.36    | 19.19     | 0                           | ***          |
| Emergence                                                                             | 2019 | 84.08     | 57.17       | 14.76   | 10.69     | 0                           | ***          |
| Canopy growth rate per plot (cm <sup>2</sup> plot <sup>-1</sup> day <sup>-1</sup> )   | 2016 | 480.43    | 281.91      | 135.82  | 52.29     | 0.01                        | **           |
| Canopy growth rate per plot (cm <sup>2</sup> plot <sup>-1</sup> day <sup>-1</sup> )   | 2017 | 994.19    | 213.31      | 174.33  | 89.61     | 0                           | ***          |
| Canopy growth rate per plot (cm <sup>2</sup> plot <sup>-1</sup> day <sup>-1</sup> )   | 2018 | 2807.86   | 1628.28     | 142.27  | 167.67    | 0                           | ***          |
| Canopy growth rate per plot (cm <sup>2</sup> plot <sup>-1</sup> day <sup>-1</sup> )   | 2019 | 2632.23   | 758.44      | 536.54  | 257.82    | 0                           | ***          |
| Canopy growth rate per plant (cm <sup>2</sup> plant <sup>-1</sup> day <sup>-1</sup> ) | 2016 | 10.91     | 7.57        | 1.58    | 2.89      | 0.047                       | *            |
| Canopy growth rate per plant (cm <sup>2</sup> plant <sup>-1</sup> day <sup>-1</sup> ) | 2017 | 38.71     | 18.47       | 7.67    | 5.62      | 0                           | ***          |
| Canopy growth rate per plant (cm <sup>2</sup> plant <sup>-1</sup> day <sup>-1</sup> ) | 2018 | 17.60     | 15.26       | 0.78    | 2.96      | 0.06                        | ns           |
| Canopy growth rate per plant (cm <sup>2</sup> plant <sup>-1</sup> day <sup>-1</sup> ) | 2019 | 31.73     | 13.26       | 5.80    | 3.67      | 0                           | ***          |
| Drone-measured canopy height 42 DAP (cm)                                              | 2016 | 13.1      | 10.0        | 4.6     | 2.7       | 0.19                        | ns           |
| Drone-measured canopy height 42 DAP (cm)                                              | 2017 | 30.2      | 9.2         | 6.2     | 3.4       | 0                           | ***          |
| Drone-measured canopy height 42 DAP (cm)                                              | 2018 | 45.4      | 36.2        | 3.0     | 3.0       | 0                           | ***          |
| Drone-measured canopy height 42 DAP (cm)                                              | 2019 | 45.0      | 23.5        | 3.1     | 5.5       | 0                           | ***          |
| Hand-measured canopy height 42 DAP (cm)                                               | 2016 | 38.31     | 28.15       | 2.46    | 2.94      | 0                           | ***          |
| Hand-measured canopy height 42 DAP (cm)                                               | 2017 | 49.37     | 39.29       | 1.35    | 1.65      | 0                           | ***          |
| Hand-measured canopy height 42 DAP (cm)                                               | 2018 | 51.60     | 43.66       | 2.00    | 2.61      | 0                           | ***          |
| Hand-measured canopy height 42 DAP (cm)                                               | 2019 | 50.80     | 33.76       | 5.58    | 2.29      | 0                           | ***          |



**Table S3.** Summary of QTLs significantly associated with growth rate in the BxO RI population. The most significant SNP(s) are listed along with the most significant SNP in the upstream and downstream directions. SNP coordinates are based on v2.1 of the *Phaseolus vulgaris Andean* genome reference sequence [61]. QTLs with identical positions between traits or years are indicated with asterisks in the chromosome column.

| Trait                                | Year | Chromosome | Most Significant SNP                                                     | Position of most Significant SNP (bp, Genome v2.1) | LOD score, most Significant SNP | Upstream Flanking SNP                 | Position of Flanking SNP 1 (Mb, Genome v2.1) | LOD Score, Flanking SNP 1 | Downstream Flanking SNP               | Position of Flanking SNP 2 (Mb, Genome v2.1) | LOD Score, Flanking SNP 2 |
|--------------------------------------|------|------------|--------------------------------------------------------------------------|----------------------------------------------------|---------------------------------|---------------------------------------|----------------------------------------------|---------------------------|---------------------------------------|----------------------------------------------|---------------------------|
| Emergence                            | 2017 | Pv10**     | sc00119ln552178_356133_C_T_101986727                                     | 39124986                                           | 6.17                            | sc01321ln8683_4_2687_G_A_3_43229024   | 33609458                                     | 6.12                      | sc00156ln4907_45_316806_T_G_121001808 | 39812966                                     | 5.88                      |
| Emergence                            | 2018 | Pv07***    | sc01522ln71313_49907_C_T_359138275, sc00659ln174637_29312_T_G_262099636  | 26581201, 26781502                                 | 4.25                            | sc00667ln1724_07_43926_G_A_263503992  | 25530277                                     | 3.15                      | sc00403ln2613_24_207173_G_A_207343141 | 26871528                                     | 4.19                      |
| Emergence                            | 2019 | Pv10       | sc02147ln44740_15412_C_T_394527222                                       | 35632623                                           | 10.06                           | sc00603ln1909_94_176505_G_A_252033814 | 35357895                                     | 9.73                      | sc00078ln6695_40_46230_G_T_76714253   | 36893960                                     | 9.71                      |
| Canopy height, hand-measured 42 DAP  | 2018 | Pv01       | sc00022ln1003704_280981_C_T_32782853                                     | 48773773                                           | 3.14                            | sc01259ln9094_3_48696_C_T_337774864   | 47084408                                     | 1.19                      | sc00022ln1003_704_178718_A_G_32680590 | 48872687                                     | 3.06                      |
| Canopy height, hand-measured 42 DAP  | 2018 | Pv07       | sc00262ln351368_226896_C_T_164426117                                     | 32298702                                           | 8.5                             | sc01434ln7822_2_42548_A_C_352565471   | 32135594                                     | 8.15                      | sc00394ln2663_95_179893_C_A_204933545 | 32612675                                     | 8.36                      |
| Canopy height, hand-measured 42 DAP  | 2019 | Pv09       | sc00105ln590179_378162_T_G_94032280, sc00105ln590179_432554_A_G_94086672 | 17007673, 16953589                                 | 4.71                            | sc00080ln6582_50_291062_G_A_78288301  | 14192463                                     | 3.18                      | sc00063ln7046_77_263799_C_T_66628438  | 17719599                                     | 4.67                      |
| Canopy height, hand-measured 42 DAP  | 2019 | Pv10       | sc01142ln101735_70111_C_A_326510153, sc00633ln181418_21828_T_C_257467034 | 37228017, 37683218                                 | 3.63                            | sc00078ln6695_40_46230_G_T_76714253   | 36893960                                     | 3.63                      | sc00119ln5521_78_356133_C_T_101986727 | 39124986                                     | 2.72                      |
| Canopy height, hand-measured 63 DAP  | 2019 | Pv07       | sc01434ln78222_42548_A_C_352565471                                       | 32135594                                           | 4.44                            | sc00138ln5101_94_187113_A_C_111872296 | 30152459                                     | 3.35                      | sc00262ln3513_68_226896_C_T_164426117 | 32298702                                     | 4.44                      |
| Canopy height, drone-measured 42 DAP | 2017 | Pv09       | sc00016ln1258381_85213_A_C_25771824                                      | 8427110                                            | 3.85                            | sc01015ln1165_54_82418_G_A_312723529  | 6088874                                      | 2.04                      | sc00042ln8192_84_180429_C_T_50792076  | 10109240                                     | 3.5                       |
| Canopy height, drone-measured 42 DAP | 2017 | Pv10       | sc00267ln345535_21418_A_G_165965167, sc00794ln147497_57984_G_T_283720856 | 8184240, 8060803                                   | 5.73                            | sc04617ln9320_7677_T_C_45_0621006     | 5625057                                      | 4.52                      | sc01197ln9668_9_83817_G_A_331981619   | 9179745                                      | 5.76                      |
| Canopy height, drone-measured 42 DAP | 2018 | Pv09*      | sc00105ln590179_378162_T_G_94032280, sc00105ln590179_432554_A_G_94086672 | 17007673, 16953589                                 | 3.63                            | sc00080ln6582_50_129523_C_T_78126762  | 14034332                                     | 2.65                      | sc00063ln7046_77_337006_T_C_66701645  | 17650074                                     | 3.34                      |

|                                                                  |      |         |                                                                            |                    |      |                                        |          |      |                                        |          |      |
|------------------------------------------------------------------|------|---------|----------------------------------------------------------------------------|--------------------|------|----------------------------------------|----------|------|----------------------------------------|----------|------|
| Canopy height, drone-measured 42 DAP                             | 2019 | Pv09*   | sc00105ln590179_378162_ T_G_94032280, sc00105ln590179_432554_ A_G_94086672 | 17007673, 16953589 | 7.44 | sc00324ln3073 18_256674_A_G_184899333  | 13555560 | 4.6  | sc00105ln5901 79_155124_C_ A_93809242  | 17226788 | 6.93 |
| Canopy height, drone-measured 42 DAP                             | 2019 | Pv10**  | sc00119ln552178_356133_ C_T_101986727                                      | 39124986           | 4.51 | sc00078ln6695 40_46230_G_T_76714253    | 36893960 | 3.13 | sc00156ln4907 45_316806_T_ G_121001808 | 39812966 | 3.18 |
| Canopy cover growth rate, emergence corrected by Loess residuals | 2017 | Pv06    | sc00162ln482802_46418_ G_A_123659537                                       | 19950405           | 3.28 | sc00534ln2099 32_154675_C_ A_238084299 | 19359174 | 2.86 | sc00827ln1420 80_1193_C_T_ 288452244   | 20003376 | 3.24 |
| Canopy cover growth rate, emergence corrected by Loess residuals | 2018 | Pv06    | sc00630ln182007_6318_ T_ C_256906010                                       | 17062325           | 3.8  | sc00734ln1580 67_119101_A_ G_274625952 | 16591001 | 3.78 | sc01288ln8860 8_79400_A_G_ 340410560   | 17688533 | 3.74 |
| Canopy cover growth rate, emergence corrected by Loess residuals | 2019 | Pv07*** | sc01522ln71313_49907_ C_ T_359138275, sc00659ln174637_29312_ T_G_262099636 | 26581201, 26781502 | 7.32 | sc03437ln1968 0_9381_G_A_4_ 33942786   | 22404289 | 7.23 | sc00403ln2613 24_207173_G_ A_207343141 | 26871528 | 7.25 |
| Canopy cover growth rate, emergence corrected by Loess residuals | 2019 | Pv09*   | sc00105ln590179_378162_ T_G_94032280, sc00105ln590179_432554_ A_G_94086672 | 17007673, 16953589 | 3.06 | sc00080ln6582 50_229923_A_ C_78227162  | 14130721 | 2.57 | sc00105ln5901 79_155124_C_ A_93809242  | 17226788 | 2.94 |
